# Supplementary material for: Galectins as Checkpoints of the Immune System in Cancers, Their Clinical Relevance, and Implication in Clinical Trials
Source: PubMed Central journal article supplement (PMC7277089; doi:10.3390/biom10050750), 2020-05-12
Supplement: biomolecules-10-00750-s001.pdf [file biomolecules-10-00750-s001.pdf]

**Table S1.** Clinical trials implicating galectins as biomarkers (1).

| CLINICAL TRIAL NUMBERS | TITLE                                                                                                                                                                              | STATUSES               | TARGETS       | BIOMARKERS      | TUMOR TYPES                 | PHASES         | RESULTS                             | START DATE | END DATE   |
|------------------------|------------------------------------------------------------------------------------------------------------------------------------------------------------------------------------|------------------------|---------------|-----------------|-----------------------------|----------------|-------------------------------------|------------|------------|
| NCT02530125            | Pidilizumab in Treating Patients With Stage III-IV Diffuse Large B-Cell Lymphoma Following First Remission                                                                         | Terminated             | PD-1          | Gal-1 Biomarker | Lymphoma                    | Phase 2        | Stopped without public explanation. | Sep 2015   | Jan 2017   |
| NCT02605512            | Breast Cancer and Cardiotoxicity Induced by Radiotherapy: the BACCARAT Study                                                                                                       | Recruiting             | Radiotherapy  | Gal-3 Biomarker | Breast Cancer               | Not Applicable |                                     | Oct 2015   | Sept 2020  |
| NCT02494453            | Pilot Study of Biomarkers and Cardiac MRI as Early Indicators of Cardiac Exposure Following Breast Radiotherapy                                                                    | Terminated             | Radiotherapy  | biomarker       | Breast Cancer               |                |                                     | June 2015  | July 2017  |
| NCT02496260            | Biomarkers and Cardiac MRI as Early Indicators of Cardiac Exposure Following Breast Radiotherapy                                                                                   | Unknown status         | Radiotherapy  | Gal-3 Biomarker | Breast Cancer               |                |                                     | July 2015  |            |
| NCT03297346            | Early Detection of Cardiovascular Changes After Radiotherapy for Breast Cancer                                                                                                     | Recruiting             | Radiotherapy  | Gal-3 Biomarker | Breast Cancer Female        | Not Applicable |                                     | Sept 2017  | May 2021   |
| NCT01347970            | Pharmacologic Reversal of Ventricular Remodeling in Childhood Cancer Survivors at Risk for Congestive Heart Failure (PREVENT-CHF): A Phase IIB Randomized Placebo-Controlled Trial | Active, not recruiting | multiple      | Gal-3 Biomarker | Cancer Survivor             | Phase 2        |                                     | May 2012   | Dec 2020   |
| NCT01511653            | Validation of Colon Biomarkers for the Early Detection of Colorectal Adenocarcinoma                                                                                                | Completed              | -             | Gal-3 Biomarker | Colon Cancer  Rectal Cancer |                |                                     | Oct 2011   | April 2019 |
| NCT00388700            | A New Agent GM-CT-01 in Combination With 5-FU, Avastin and Leucovorin in Subjects With Colorectal Cancer                                                                           | Withdrawn              | Galectins     | Gal-3 Biomarker | Colorectal Cancer           | Phase 2        |                                     | Oct 2006   |            |
| NCT02717507            | Carvedilol in Preventing Heart Failure in Childhood Cancer Survivors                                                                                                               | Recruiting             | Beta-blockers | Gal-3 Biomarker | Malignant Neoplasm          | Phase 2        |                                     | April 2016 |            |

**Table S2.** Clinical trials implicating galectins as biomarkers (2).

| CLINICAL TRIAL NUMBERS | TITLE                                                                                                                                     | STATUSES               | TARGETS            | BIOMARKERS               | TUMOR TYPES                      | PHASES           | RESULTS | START DATE    | END DATE      |
|------------------------|-------------------------------------------------------------------------------------------------------------------------------------------|------------------------|--------------------|--------------------------|----------------------------------|------------------|---------|---------------|---------------|
| NCT02117362            | Galectin Inhibitor (GR-MD-02) and Ipilimumab in Patients With Metastatic Melanoma                                                         | Completed              | PD-1               | Gal-3 Biomarker          | Metastatic Melanoma              | Phase 1          |         | May 2014      | Nov 2018      |
| NCT03488134            | Predicting Prognosis and Recurrence of Thyroid Cancer Via New Biomarkers, Urinary Exosomal Thyroglobulin and Galectin-3                   | Active, not recruiting | Gal-3 Prognostic   | Gal-3 Biomarker          | Thyroid Cancer                   |                  |         | Aug 2018      | July 31, 2023 |
| NCT01896999            | Brentuximab Vedotin and Nivolumab With or Without Ipilimumab in Treating Patients With Relapsed or Refractory Hodgkin Lymphoma            | Recruiting             | PD-1 +CTLA-4 +CD30 | Biomarkers (Gal-1+Tim-3) | Lymphoma                         | Phase 1  Phase 2 |         | Jan 24, 2014  |               |
| NCT03940352            | HDM201 in Combination With MBG453 or Venetoclax in Patients With Acute Myeloid Leukemia (AML) or High-risk Myelodysplastic Syndrome (MDS) | Recruiting             | P53                | Tim-3 Biomarker          | AML                              | Phase 1          |         | June 24, 2019 | Apr 22, 2021  |
| NCT03289819            | Neoadjuvant Pembrolizumab(Pbr)/Nab-Paclitaxel Followed by Pbr/Epirubicin/Cyclophosphamide in TNBC                                         | Active, not recruiting | PD-1 + Chemother   | Tim-3 Biomarker          | Breast Cancer                    | Phase 2          |         | Mar 23, 2018  | Sep 2020      |
| NCT02303366            | Pilot Study of Stereotactic Ablation for Oligometastatic Breast Neoplasia in Combination With the Anti-PD-1 Antibody MK-3475              | Completed              | PD-1               | Tim-3 Biomarker          | Breast Neoplasms  Bone Neoplasms | Phase 1          |         | Sep 2015      | Apr 2017      |
| NCT03661047            | OMega-3 Fatty Acid for the Immune Modulation of Colon Cancer                                                                              | Recruiting             | Metabolism         | Tim-3 Biomarker          | Colon Cancer                     | Phase 2          |         | Nov 30, 2019  | Sep 2023      |
| NCT04001101            | Anti-PD-1 +/- RT for MSI-H Solid Tumors                                                                                                   | Recruiting             | PD-1               | Tim-3 Biomarker          | Colorectal Cancer                | Phase 2          |         | Oct 10, 2019  | July 2021     |
| NCT03609424            | PDR001 Plus Imatinib for Metastatic or Unresectable GIST                                                                                  | Recruiting             | PD-1               | Tim-3 Biomarker          | Gastrointestinal Stromal Tumors  | Phase 1  Phase 2 |         | Feb 14, 2019  | Aug 30, 2020  |

**Table S3.** Clinical trials implicating galectins as biomarkers (3).

| CLINICAL TRIAL NUMBERS | TITLE                                                                                                                       | STATUS                 | TARGETS          | BIOMARKERS      | TUMOR TYPES                | PHASES         | RESULTS | START DATE     | END DATE    |
|------------------------|-----------------------------------------------------------------------------------------------------------------------------|------------------------|------------------|-----------------|----------------------------|----------------|---------|----------------|-------------|
| NCT03961971            | Trial of Anti-Tim-3 in Combination With Anti-PD-1 and SRS in Recurrent GBM                                                  | Recruiting             | PD-1             | Tim-3 Biomarker | Glioblastoma<br>Multiforme | Phase 1        |         | Feb 18, 2020   | Feb 2024    |
| NCT03066648            | Study of PDR001 and/or MBG453 in Combination With Decitabine in Patients With AML or High Risk MDS                          | Recruiting             | PD-1             | Tim-3 Biomarker | Leukemia                   | Phase 1        |         | Oct 29, 2010   | Apr 1, 2021 |
| NCT03680508            | TSR-022 (Anti-TIM-3 Antibody) and TSR-042 (Anti-PD-1 Antibody) in Patients With Liver Cancer                                | Recruiting             | -                | Tim-3 Biomarker | Liver Cancer               | Phase 2        |         | Nov 4, 2019    | Oct 2023    |
| NCT03549546            | Expression of the Inhibitory Receptors on Lymphocytes T Cells After Lung Cancer Surgery.                                    | Completed              | Surgery          | Tim-3 Biomarker | Lung Cancer                | Not Applicable |         | June 14, 2018  | Feb 2019    |
| NCT02846103            | Study of Anti-telomerase T CD4 Immunity in Metastatic Lung Cancer                                                           | Unknown status         | -                | Tim-3 Biomarker | Lung Cancer                | Not Applicable |         | Dec 2015       | Dec 2019    |
| NCT03489343            | Sym023 (Anti-TIM-3) in Patients With Advanced Solid Tumor Malignancies or Lymphomas                                         | Active, not recruiting | -                | Tim-3 Biomarker | Lymphoma                   | Phase 1        |         | May 30, 2018   | Sept 2020   |
| NCT03311412            | Sym021 Monotherapy and in Combination With Sym022 or Sym023 in Patients With Advanced Solid Tumor Malignancies or Lymphomas | Recruiting             | PD-1             | Tim-3 Biomarker | Lymphoma                   | Phase 1        |         | Dec 7, 2017    | Nov 2020    |
| NCT03873805            | PSCA-CAR T Cells in Treating Patients With PSCA+ Metastatic Castration Resistant Prostate Cancer                            | Recruiting             | CART             | Tim-3 Biomarker | mCRPC                      | Phase 1        |         | May 23, 2019   | Feb 2021    |
| NCT03772899            | Fecal Microbial Transplantation in Combination With Immunotherapy in Melanoma Patients (MIMic)                              | Recruiting             | Fecal + Immunoth | Tim-3 Biomarker | Melanoma                   | Phase 1        |         | March 27, 2019 | Dec 2023    |
| NCT03089606            | Pembrolizumab TX-naïve Distant Mets Melanoma and Use of AMT (PET) at Baseline as Imaging Biomarker                          | Recruiting             | PD-1             | Tim-3 Biomarker | Melanoma                   | Phase 2        |         | June 1, 2017   | June 2022   |

**Table S4.** Clinical trials implicating galectins as biomarkers (4).

| CLINICAL TRIAL NUMBERS | TITLE                                                                                                                       | STATUS                 | TARGETS            | BIOMARKERS      | TUMOR TYPES             | PHASES         | RESULTS | START DATE        | END DATE           |
|------------------------|-----------------------------------------------------------------------------------------------------------------------------|------------------------|--------------------|-----------------|-------------------------|----------------|---------|-------------------|--------------------|
| NCT03961971            | Trial of Anti-Tim-3 in Combination With Anti-PD-1 and SRS in Recurrent GBM                                                  | Recruiting             | PD-1               | Tim-3 Biomarker | Glioblastoma Multiforme | Phase 1        |         | February 18, 2020 | February 20, 2024  |
| NCT03066648            | Study of PDR001 and/or MBG453 in Combination With Decitabine in Patients With AML or High Risk MDS                          | Recruiting             | PD-1               | Tim-3 Biomarker | Leukemia                | Phase 1        |         | October 29, 2020  | April 1, 2021      |
| NCT03680508            | TSR-022 (Anti-TIM-3 Antibody) and TSR-042 (Anti-PD-1 Antibody) in Patients With Liver Cancer                                | Recruiting             | -                  | Tim-3 Biomarker | Liver Cancer            | Phase 2        |         | November 4, 2019  | October 20, 2023   |
| NCT03549546            | Expression of the Inhibitory Receptors on Lymphocytes T Cells After Lung Cancer Surgery.                                    | Completed              | Surgery            | Tim-3 Biomarker | Lung Cancer             | Not Applicable |         | June 14, 2018     | February 20, 2019  |
| NCT02846103            | Study of Anti-telomerase T CD4 Immunity in Metastatic Lung Cancer                                                           | Unknown status         | -                  | Tim-3 Biomarker | Lung Cancer             | Not Applicable |         | December 5, 2015  | December 20, 2019  |
| NCT03489343            | Sym023 (Anti-TIM-3) in Patients With Advanced Solid Tumor Malignancies or Lymphomas                                         | Active, not recruiting | -                  | Tim-3 Biomarker | Lymphoma                | Phase 1        |         | May 30, 2018      | September 20, 2020 |
| NCT03311412            | Sym021 Monotherapy and in Combination With Sym022 or Sym023 in Patients With Advanced Solid Tumor Malignancies or Lymphomas | Recruiting             | PD-1               | Tim-3 Biomarker | Lymphoma                | Phase 1        |         | December 7, 2017  | November 20, 2020  |
| NCT03873805            | PSCA-CAR T Cells in Treating Patients With PSCA+ Metastatic Castration Resistant Prostate Cancer                            | Recruiting             | CART               | Tim-3 Biomarker | mCRPC                   | Phase 1        |         | May 23, 2019      | February 20, 2021  |
| NCT03772899            | Fecal Microbial Transplantation in Combination With Immunotherapy in Melanoma Patients (MIMic)                              | Recruiting             | Fecal Th+ Immunoth | Tim-3 Biomarker | Melanoma                | Phase 1        |         | March 27, 2019    | December 20, 2023  |
| NCT03089606            | Pembrolizumab TX-naïve Distant Mets Melanoma and Use of AMT (PET) at Baseline as Imaging Biomarker                          | Recruiting             | PD-1               | Tim-3 Biomarker | Melanoma                | Phase 2        |         | June 1, 2017      | June 20, 2022      |

**Table S5.** Clinical trials implicating galectins as biomarkers (5).

| CLINICAL TRIAL NUMBERS | TITLE                                                                                                                             | STATUS                 | TARGETS         | BIOMARKERS      | TUMOR TYPES    | PHASES            | RESULTS                             | START DATE     | END DATE       |
|------------------------|-----------------------------------------------------------------------------------------------------------------------------------|------------------------|-----------------|-----------------|----------------|-------------------|-------------------------------------|----------------|----------------|
| NCT04253145            | Study to Assess Safety, Tolerability, Efficacy of PM01183 and Atezolizumab in Patients w/ Advanced Small Cell Lung Cancer.        | Recruiting             | PD-L1 + DNA     | Tim-3 Biomarker | NSCLC          | Phase 1           |                                     | Dec 13, 2019   | Feb 20, 2022   |
| NCT03121417            | Nivolumab in Treating Patients With Advanced Metastatic Non-small Cell Lung Cancer                                                | Withdrawn              | PD-1            | Tim-3 Biomarker | NSCLC          | Phase 2           |                                     | July 21, 2017  | Mar 20, 2019   |
| NCT01567891            | CT Antigen TCR-redirectioned T Cells for Ovarian Cancer.                                                                          | Completed              | Immuno th       | Tim-3 Biomarker | Ovarian Cancer | Phase 1   Phase 2 |                                     | July 9, 2013   | June 20, 2017  |
| NCT03618355            | Trial of eRapa in Prostate Cancer Patients                                                                                        | Active, not recruiting |                 | Tim-3 Biomarker | Pca            | Phase 1           |                                     | July 20, 2018  | July 20, 2020  |
| NCT02636725            | Axitinib and Pembrolizumab in Subjects With Advanced Alveolar Soft Part Sarcoma and Other Soft Tissue Sarcomas                    | Active, not recruiting | PD-1 + Chemo th | Tim-3 Biomarker | Sarcomas       | Phase 2           |                                     | April 19, 2016 | March 20, 2021 |
| NCT03946943            | Study of Anlotinib Hydrochloride and Toripalimab in Subjects With Unresectable or Metastatic Undifferentiated Pleomorphic Sarcoma | Not yet recruiting     | PD-1            | Tim-3 Biomarker | Sarcomas       | Phase 2           |                                     | July 19, 2019  | July 20, 2023  |
| NCT03099109            | A Study of LY3321367 Alone or With LY3300054 in Participants With Advanced Relapsed/Refractory Solid Tumors                       | Active, not recruiting | PD-L1           | Tim-3 Biomarker | Solid Tumor    | Phase 1           |                                     | April 12, 2017 | June 20, 2020  |
| NCT03752177            | A Study of LY3415244 in Participants With Advanced Solid Tumors                                                                   | Terminated             | PD-L1           | Tim-3 Biomarker | Solid Tumor    | Phase 1           | Stopped without public explanation. | Nov 22, 2018   | Oct 20, 2019   |
| NCT03744468            | Study of BGB-A425 in Combination With Tislelizumab in Advanced Solid Tumors                                                       | Recruiting             | -               | Tim-3 Biomarker | Solid tumors   | Phase 1   Phase 2 |                                     | Nov 13, 2018   | Dec 20, 2021   |

**Table S6.** Clinical trials implicating galectins as biomarkers (6).

| CLINICAL TRIAL NUMBERS | TITLE                                                                                                                                                                              | STATUSES               | TARGETS                       | BIOMARKERS      | TUMOR TYPES         | PHASES           | RESULTS                                                         | START DATE   | END DATE    |
|------------------------|------------------------------------------------------------------------------------------------------------------------------------------------------------------------------------|------------------------|-------------------------------|-----------------|---------------------|------------------|-----------------------------------------------------------------|--------------|-------------|
| NCT01100944            | A Phase 1/2 Study of PXD101 (Belinostat) in Combination With Cisplatin, Doxorubicin and Cyclophosphamide in the First Line Treatment of Advanced or Recurrent Thymic, Malignancies | Terminated             | HDAC +Radiation +Chemotherapy | Tim-3 Biomarker | Thymic malignancies | Phase 1  Phase 2 | 2 out of 6 patients experienced a dose limiting toxicity (DLT). | Mar 4, 2010  | Oct 2015    |
| NCT03307785            | Study of Niraparib, TSR-022, Bevacizumab, and Platinum-Based Doublet Chemotherapy in Combination With TSR-042                                                                      | Active, not recruiting | PD-1 + VEGF +Chemotherapy     | Tim-3 Biomarker | Various             | Phase 1          |                                                                 | Oct 12, 2017 | Feb 2021    |
| NCT03058289            | A Phase 1/2 Safety Study of Intratumorally Dosed INT230-6                                                                                                                          | Recruiting             | Chemotherapy                  | Tim-3 Biomarker | Various             | Phase 1  Phase 2 |                                                                 | Feb 9, 2017  | Oct 2022    |
| NCT03595124            | A Study to Compare Treatments for a Type of Kidney Cancer Called TFE/Translocation Renal Cell Carcinoma (tRCC)                                                                     | Recruiting             | multiple                      | Tim-3 Biomarker | Various             | Phase 2          |                                                                 | Oct 9, 2018  | Jan 9, 2024 |
| NCT03684785            | Intratumoral AST-008 Combined With Pembrolizumab in Patients With Advanced Solid Tumors                                                                                            | Recruiting             | PD-1 + Anti-TLR9              | Tim-3 Biomarker | Various             | Phase 1  Phase 2 |                                                                 | Dec 13, 2018 | Apr 2021    |

Table S7. Clinical trials using galectins inhibitors (1).

| CLINICAL TRIAL NUMBERS | TITLE                                                                                                                 | STATUSES       | TARGETS        | BIOMARKERS      | TUMOR TYPES         | PHASES             | RESULTS | START DATE | END DATE     |
|------------------------|-----------------------------------------------------------------------------------------------------------------------|----------------|----------------|-----------------|---------------------|--------------------|---------|------------|--------------|
| NCT01724320            | A Phase 1, First-in-man Study of OTX008 Given Subcutaneously as a Single Agent to Patients With Advanced Solid Tumors | Unknown status | Gal-1          |                 | Solid Tumors        | Phase 1            |         | Feb 2012   | May 2013     |
| NCT00388700            | A New Agent GM-CT-01 in Combination With 5-FU, Avastin and Leucovorin in Subjects With Colorectal Cancer              | Withdrawn      | Galectins      | Gal-3 Biomarker | Colorectal Cancer   | Phase 2            |         | Oct 2006   |              |
| NCT00776802            | GCS-100LE in Combination With Etoposide and Dexamethasone in Relapsed or Refractory Diffuse Large B-Cell Lymphoma     | Withdrawn      | Gal-3          |                 | Lymphoma            | Phase 1<br>Phase 2 |         | July 2008  | April 2009   |
| NCT01723813            | Peptide Vaccinations Plus GM-CT-01 in Melanoma                                                                        | Terminated     | Gal-3 +Vaccine |                 | Metastatic Melanoma | Phase 1<br>Phase 2 | [1–2]   | April 2012 | April 2015   |
| NCT01681823            | Effect of Modified Citrus Pectin on PSA Kinetics in Biochemical Relapsed PC With Serial Increases in PSA              | Completed      | Gal-3          |                 | Prostatic Neoplasms | Phase 2            | [3–8]   | June 2013  | January 2020 |

Table S8. Clinical trials using galectins inhibitors (2).

| CLINICAL TRIAL NUMBERS | TITLE                                                                                                                                                                              | STATUSES               | TARGETS                       | BIOMARKERS      | TUMOR TYPES         | PHASES             | RESULTS                                                         | START DATE    | END DATE      |
|------------------------|------------------------------------------------------------------------------------------------------------------------------------------------------------------------------------|------------------------|-------------------------------|-----------------|---------------------|--------------------|-----------------------------------------------------------------|---------------|---------------|
| NCT01100944            | A Phase 1/2 Study of PXD101 (Belinostat) in Combination With Cisplatin, Doxorubicin and Cyclophosphamide in the First Line Treatment of Advanced or Recurrent Thymic, Malignancies | Terminated             | HDAC +Radiation +Chemotherapy | Tim-3 Biomarker | Thymic malignancies | Phase 1<br>Phase 2 | 2 out of 6 patients experienced a dose limiting toxicity (DLT). | March 2010    | October 2015  |
| NCT03307785            | Study of Niraparib, TSR-022, Bevacizumab, and Platinum-Based Doublet Chemotherapy in Combination With TSR-042                                                                      | Active, not recruiting | PD-1 + VEGF +Chemotherapy     | Tim-3 Biomarker | Various             | Phase 1            |                                                                 | October 2017  | February 2021 |
| NCT03058289            | A Phase 1/2 Safety Study of Intratumorally Dosed INT230-6                                                                                                                          | Recruiting             | Chemotherapy                  | Tim-3 Biomarker | Various             | Phase 1<br>Phase 2 |                                                                 | February 2017 | October 2022  |
| NCT03595124            | A Study to Compare Treatments for a Type of Kidney Cancer Called TFE/Translocation Renal Cell Carcinoma (tRCC)                                                                     | Recruiting             | multiple                      | Tim-3 Biomarker | Various             | Phase 2            |                                                                 | October 2018  | January 2024  |
| NCT03684785            | Intratumoral AST-008 Combined With Pembrolizumab in Patients With Advanced Solid Tumors                                                                                            | Recruiting             | PD-1 + Anti-TLR9              | Tim-3 Biomarker | Various             | Phase 1<br>Phase 2 |                                                                 | December 2018 | April 2021    |

**Table S9.** Clinical trials using galectins inhibitors (3).

| CLINICAL TRIAL NUMBERS | TITLE                                                                                                                | STATUSES   | TARGETS                  | BIOMARKERS | TUMOR TYPES         | PHASES  | RESULTS                              | START DATE   | END DATE  |
|------------------------|----------------------------------------------------------------------------------------------------------------------|------------|--------------------------|------------|---------------------|---------|--------------------------------------|--------------|-----------|
| NCT02817633            | A Phase 1 Study of TSR-022, an Anti-TIM-3 Monoclonal Antibody, in Patients With Advanced Solid Tumors (AMBER)        | Recruiting | TIM-3                    |            | Solid Tumors        | Phase 1 |                                      | July 2016    | June 2022 |
| NCT03652077            | A Safety and Tolerability Study of INCAGN02390 in Select Advanced Malignancies                                       | Recruiting | TIM-3                    |            | Various             | Phase 1 |                                      | Aug 29, 2018 | Jan 2021  |
| NCT00110721            | GM-CT-01 Plus 5-Fluorouracil as Third- or Fourth-Line Therapy for Metastatic Colorectal Cancer                       | Terminated | Galectins + ADN          |            | Colorectal Cancer   | Phase 2 | Stopped without public explanation.  | May 2005     | Mar 2012  |
| NCT00054977            | Safety of GM-CT-01 With and Without 5-Fluorouracil in Patients With Solid Tumors                                     | Completed  | Galectins + DNA          |            | various             | Phase 1 |                                      | Feb 2003     |           |
| NCT02117362            | Galectin Inhibitor (GR-MD-02) and Ipilimumab in Patients With Metastatic Melanoma                                    | Completed  | Galectins (Gal-3) + PD-1 |            | Metastatic Melanoma | Phase 1 | Stopped and Continued by NCT02575404 | May 8, 2014  | Nov 2018  |
| NCT02575404            | GR-MD-02 Plus Pembrolizumab in Melanoma, Non-small Cell Lung Cancer, and Squamous Cell Head and Neck Cancer Patients | Recruiting | Galectins (Gal-3) + PD-1 |            | Various             | Phase 1 |                                      | May 16, 2016 |           |



## Reference

1. Demotte, N.; Bigirimana, R.; Wieers, G.; Stroobant, V.; Squifflet, J. L.; Carrasco, J.; Thielemans, K.; Baurain, J. F.; Van Der Smissen, P.; Courtoy, P. J.; et al. A short treatment with galactomannan GM-CT-01 corrects the functions of freshly isolated human tumor-infiltrating lymphocytes. *Clin. Cancer Res.* **2014**, *20*, 1823–1833.
2. Demotte, N.; Wieers, G.; Van Der Smissen, P.; Moser, M.; Schmidt, C.; Thielemans, K.; Squifflet, J. L.; Weynand, B.; Carrasco, J.; Lurquin, C.; et al. A Galectin-3 Ligand Corrects the Impaired Function of Human CD4 and CD8 Tumor-Infiltrating Lymphocytes and Favors Tumor Rejection in Mice. *Cancer Res.* **2010**, *70*, 7476–7488.
3. Abu-Elsaad, N. M.; Elkashef, W. F. Modified citrus pectin stops progression of liver fibrosis by inhibiting galectin-3 and inducing apoptosis of stellate cells. *Can. J. Physiol. Pharmacol.* **2016**, *94*, 554–562.
4. Delphi, L.; Sepehri, H.; Khorramizadeh, M. R.; Mansoori, F. Pectic-Oligosaccharides from Apples Induce Apoptosis and Cell Cycle Arrest in MDA-MB-231 Cells, a Model of Human Breast Cancer. *Asian Pac. J. Cancer Prev.* **2015**, *16*, 5265–5271.
5. Ahmad, N.; Gabius, H. J.; Andre, S.; Kaltner, H.; Sabesan, S.; Roy, R.; Liu, B.; Macaluso, F.; Brewer, C. F. Galectin-3 precipitates as a pentamer with synthetic multivalent carbohydrates and forms heterogeneous cross-linked complexes. *J. Biol. Chem.* **2004**, *279*, 10841–10847.
6. Chauhan, D.; Li, G.; Podar, K.; Hideshima, T.; Neri, P.; He, D.; Mitsiades, N.; Richardson, P.; Chang, Y.; Schindler, J.; et al. A novel carbohydrate-based therapeutic GCS-100 overcomes bortezomib resistance and enhances dexamethasone-induced apoptosis in multiple myeloma cells. *Cancer Res.* **2005**, *65*, 8350–8358.
7. Traber, P. G.; Chou, H.; Zomer, E.; Hong, F.; Klyosov, A.; Fiel, M. I.; Friedman, S. L. Regression of fibrosis and reversal of cirrhosis in rats by galectin inhibitors in thioacetamide-induced liver disease. *PLoS ONE* **2013**, *8*, e75361.
8. Traber, P. G.; Zomer, E. Therapy of experimental NASH and fibrosis with galectin inhibitors. *PLoS ONE* **2013**, *8*, e83481.
